# Supplementary material for: miR-133b, a particular member of myomiRs, coming into playing its unique pathological role in human cancer
Source: PubMed Central journal article supplement (PMC5564843; doi:10.18632/oncotarget.16745), 2017-03-31
Supplement: oncotarget-08-50193-s001.pdf [file oncotarget-08-50193-s001.pdf]

## miR-133b, a particular member of myomiRs, coming into playing its unique pathological role in human cancer

### Supplementary Materials

**Supplementary Table 1: The target genes of miR-133b.** Sheet 1: the target genes which processed from five miRNA prediction software programs (TargetScan, PicTar, PITA, miRanda and RNA22) and supported by CLIP-Seq data, more details can be found in starBase v2.0. Sheet 2 and Sheet 3 provided the experimentally validated target genes from the DIANA-TarBase v7.0 and miRTarBase 6.0. Sheet 4 provided the intersection of starBase v2.0, DIANA-TarBase v7.0 and miRTarBase 6.0. See Supplementary\_Table\_1

**Supplementary Table 2: The enrichment analysis of target genes of miR-133b.** Sheet 1: KEGG pathway enrichment analysis; Sheet 2: OMIM\_Disease enrichment analysis. All result proceed from Enrichr. See Supplementary\_Table\_2
